# Supplementary material for: Dynamical and chemical processes contributing to ozone loss inexceptional Arctic stratosphere winter-spring of 2020
Source: Copernicus journal article supplement (doi:10.5194/acp-2021-11), 2021-01-29
Supplement: Supplementary file [file acp-2021-11-AC4-supplement.pdf]

## Supplement 2

### Trajectory analysis

Results of backward and forward simulations are presented as a supplement to Fig.5a.

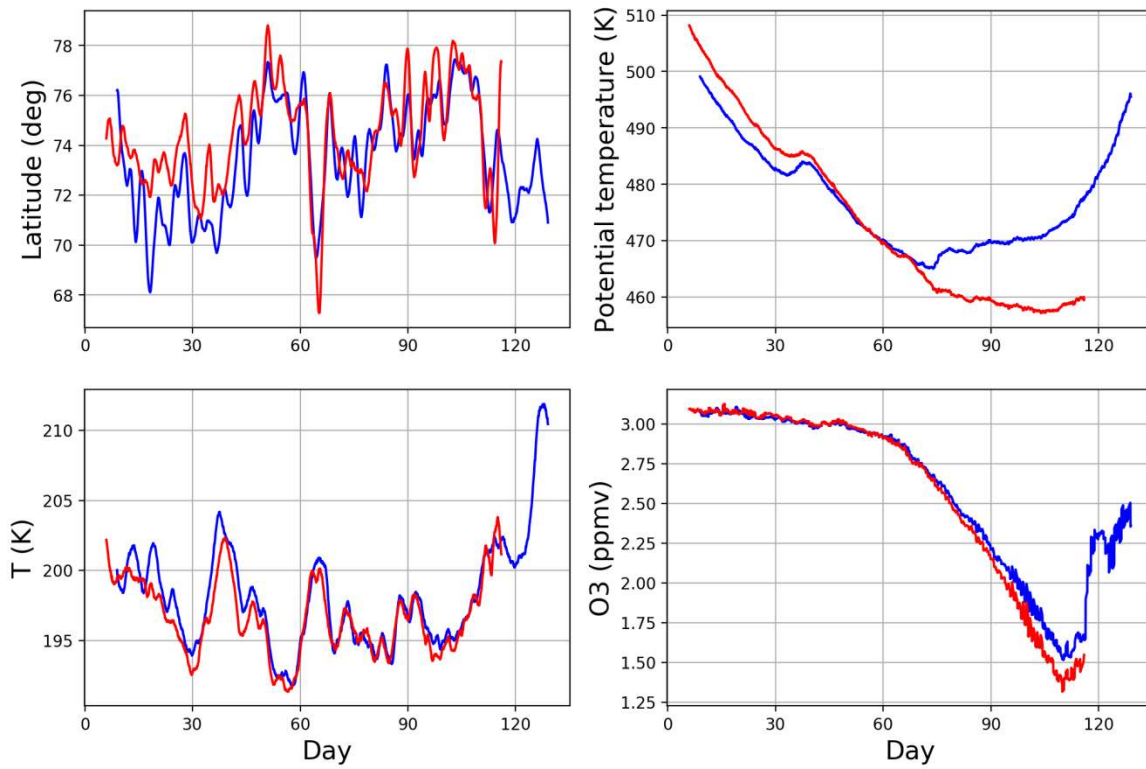

Fig.S2.1. Trajectory ensemble averaged latitude (top-left), potential temperature (top-right), temperature (bottom-left) and ozone (bottom-right); backward (red), forward (blue) for winter-spring 2010-2011.

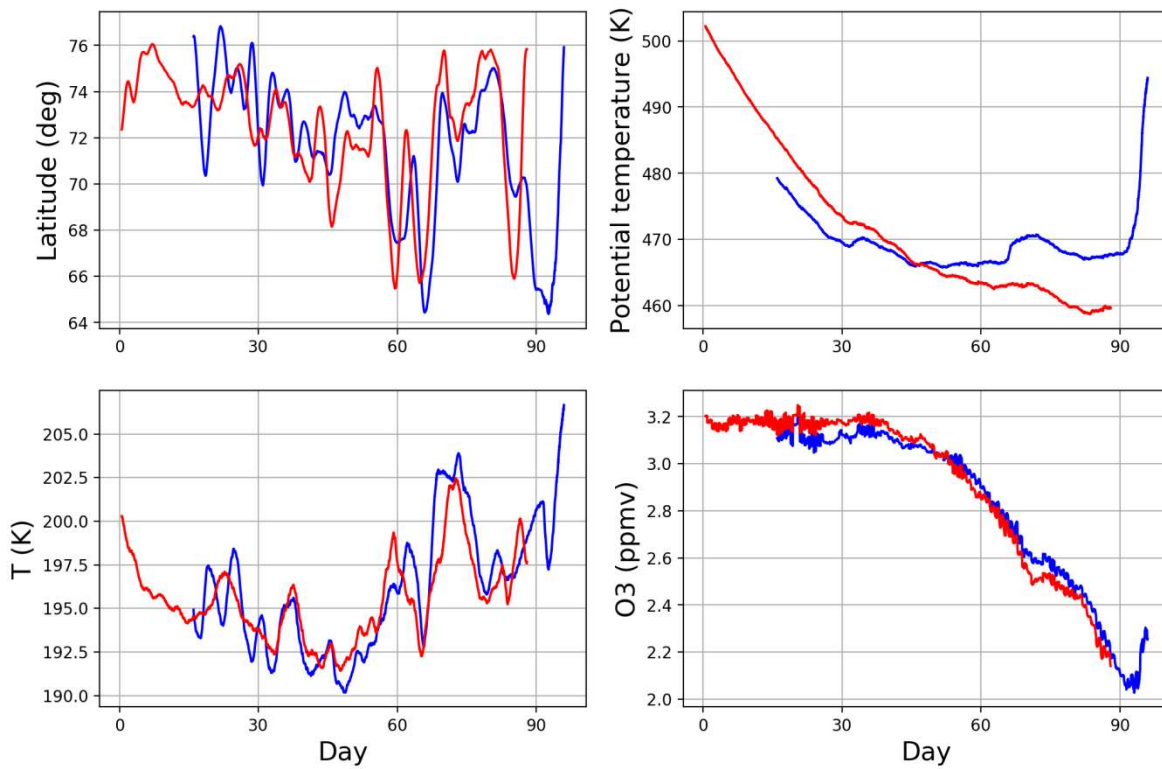

Fig.S2.2. Same as Fig.S2.1 for winter-spring 2015-2016.

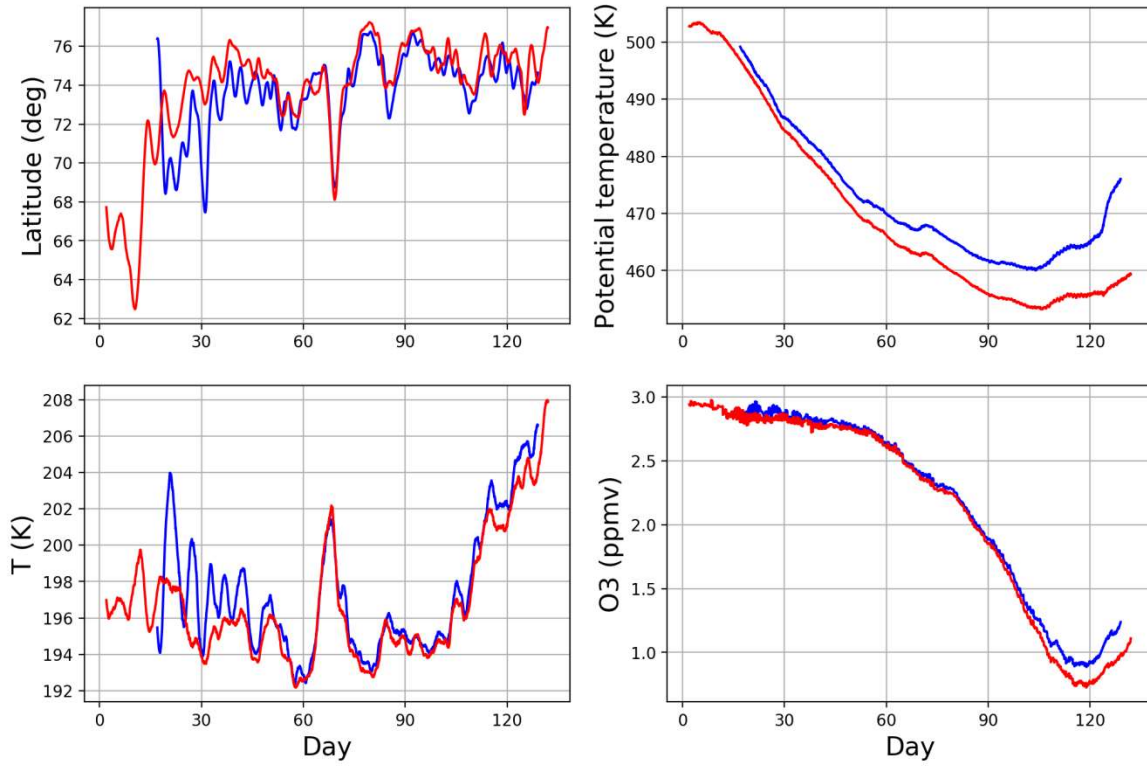

Fig.S2.3. Same as Fig. S2.1 for winter-spring 2019-2020.
